# Supplementary material for: Assessing pooled BAC and whole genome shotgun strategies for assembly of complex genomes
Source: BMC Genomics. 2011 Apr 15;12:194. doi: 10.1186/1471-2164-12-194 (PMC3224119; doi:10.1186/1471-2164-12-194)
Supplement: Additional file 3 — Arabidopsis pooled BAC assembly statistics. Table with Arabidopsis pooled BAC assembly statistics. [file 1471-2164-12-194-S3.XLS]

## Sheet: Sheet 1
Arabidopsis assembly statistics for 3 Mbp and 12 Mbp pool assemblies.
Mixture	Pool Size	Scaffolds	Contigs	Contigs/Scaffold (avg)	Scaffold Len. (bp)	Scaffold N50	Smallest Scaffold	Longest Scaffold	Scaffold Gaps	Gap Len. (avg)	Contig Len. (avg)	Degenerates	Degenerate Len. (avg)	UUnitigs	UUnitig Len. (avg)	Surrogates	Surrogate Len. (avg)
0L-10P	3M	22	151	6.86	2903837	245728	1502	511608	129	66	19231	222	343	2710	1233	583	356
0L-15P	3M	27	62	2.3	2930697	212300	280	294563	35	182	47269	200	320	3010	1166	723	351
0L-20P	3M	30	49	1.63	2953773	252126	278	388077	19	275	60281	208	303	3910	949	875	336
0L-5P	3M	71	1317	18.55	2544471	88240	222	177670	1246	125	1932	773	407	3225	859	311	445
10L-0P	3M	218	218	1	2924750	32812	1039	168186	0	0	13416	465	583	218	14105	0	0
10L-10P	3M	22	39	1.77	2978163	338961	397	879280	17	390	76363	116	465	2581	1423	475	465
10L-15P	3M	30	43	1.43	3015075	241398	277	339817	13	658	70118	137	414	4641	869	660	495
10L-20P	3M	28	49	1.75	3001705	221174	308	581566	21	539	61259	161	420	7599	604	854	452
10L-5P	3M	20	28	1.4	2984645	337960	1036	481142	8	528	106594	123	487	918	3601	292	566
15L-0P	3M	190	190	1	2939857	71538	1004	168558	0	0	15473	529	585	190	16623	0	0
15L-10P	3M	18	28	1.56	3000842	386636	453	640138	10	584	107173	116	461	2336	1579	459	564
15L-15P	3M	24	39	1.62	2999764	335566	451	536876	15	697	76917	159	442	5267	807	764	471
15L-20P	3M	26	44	1.69	3000878	295653	466	632499	18	476	68202	191	449	8784	561	952	443
15L-5P	3M	12	27	2.25	2972316	891801	1201	1015708	15	443	110086	152	499	887	3820	305	535
20L-0P	3M	165	165	1	2946413	75852	1004	237199	0	0	17857	566	557	165	19505	0	0
20L-10P	3M	23	36	1.57	3013532	306651	214	570340	13	539	83709	152	429	2776	1375	569	542
20L-15P	3M	26	41	1.58	3010913	246917	468	671762	15	330	73437	175	440	5836	757	752	509
20L-20P	3M	24	46	1.92	2996552	481714	462	608398	22	426	65142	295	461	9655	530	927	465
20L-5P	3M	16	23	1.44	2979956	422185	1008	681033	7	160	129563	182	482	905	3814	323	531
5L-0P	3M	540	540	1	2779499	7859	1002	98173	0	0	5147	440	639	540	5292	0	0
5L-10P	3M	40	55	1.38	3041744	146099	425	622296	15	955	55304	169	642	2097	1506	470	1025
5L-15P	3M	23	33	1.43	3002508	333544	417	597037	10	672	90985	95	370	3536	1061	594	476
5L-20P	3M	22	38	1.73	2975203	313602	160	678141	16	512	78295	143	398	6490	666	799	385
5L-5P	3M	16	78	4.88	2960717	398006	1014	595682	62	80	37958	90	517	1294	2517	274	576
0L-10P	12M	37	621	16.78	11901886	1172348	334	1899655	584	68	19166	286	348	6769	1950	1016	360
0L-15P	12M	44	131	2.98	11922935	811266	259	1886170	87	135	91015	288	332	7571	1818	1296	338
0L-20P	12M	42	119	2.83	11932653	1066360	225	3680962	77	269	100274	216	337	9352	1536	1436	317
0L-5P	12M	185	5666	30.63	10720999	139557	73	622365	5481	123	1892	1703	439	11980	969	603	422
10L-0P	12M	509	509	1	11945070	61983	1003	260947	0	0	23468	746	569	509	24699	0	0
10L-10P	12M	27	45	1.67	11995202	2577654	261	3596841	18	388	266560	156	420	5618	2492	801	479
10L-15P	12M	51	77	1.51	12101745	656542	393	1923624	26	536	157166	185	391	13282	1165	1254	516
10L-20P	12M	62	84	1.35	12118082	557114	242	1164124	22	448	144263	265	384	21518	792	1594	504
10L-5P	12M	28	54	1.93	11982722	1903497	556	2577723	26	155	221902	151	494	2235	5913	502	514
15L-0P	12M	366	366	1	11980940	143361	1004	722568	0	0	32735	891	552	366	35210	0	0
15L-10P	12M	39	62	1.59	12069433	973700	354	2386258	23	459	194668	222	459	6098	2352	821	576
15L-15P	12M	46	68	1.48	12096609	794251	260	1936169	22	674	177891	278	436	14158	1124	1338	535
15L-20P	12M	56	86	1.54	12143889	601620	402	1522308	30	443	141208	326	412	25611	704	1722	532
15L-5P	12M	24	40	1.67	12035100	1591134	470	3157083	16	445	300878	227	480	1978	6794	552	612
20L-0P	12M	310	310	1	11950588	231527	1003	742243	0	0	38550	973	559	310	41937	0	0
20L-10P	12M	41	56	1.37	12067677	1320403	281	1776280	15	356	215494	260	478	6379	2281	909	561
20L-15P	12M	49	76	1.55	12079608	658880	525	1196066	27	474	158942	310	452	12697	1246	1201	562
20L-20P	12M	66	80	1.21	12153057	364600	446	1635458	14	643	151913	346	433	28231	660	1695	560
20L-5P	12M	19	33	1.74	11989579	2577724	594	3848294	14	254	363321	281	488	2036	6707	529	530
5L-0P	12M	1821	1821	1	11452702	9500	1005	101804	0	0	6289	911	608	1821	6470	0	0
5L-10P	12M	34	69	2.03	11995019	3069840	370	3468513	35	284	173841	124	421	5293	2575	774	467
5L-15P	12M	41	67	1.63	12082043	652392	262	3560151	26	266	180329	184	390	11336	1303	1287	486
5L-20P	12M	44	65	1.48	12045512	1026725	220	2688767	21	550	185316	222	385	19235	851	1559	422
5L-5P	12M	22	191	8.68	11992117	2145006	270	2514319	169	82	62786	113	442	2748	4692	494	584
