# Supplementary material for: Assessing pooled BAC and whole genome shotgun strategies for assembly of complex genomes
Source: BMC Genomics. 2011 Apr 15;12:194. doi: 10.1186/1471-2164-12-194 (PMC3224119; doi:10.1186/1471-2164-12-194)
Supplement: Additional file 4 — Detailed Arabidopsis pooled BAC assembly statistics. Table showing detailed Arabidopsis assembly statistics for 3Mbp and 12Mbp pool assemblies. [file 1471-2164-12-194-S4.XLS]

## Sheet: Sheet 1
Detailed Arabidopsis pooled BAC assembly statistics.
	0L-5P.default.12M	0L-10P.default.12M	0L-15P.default.12M	0L-20P.default.12M	5L-0P.default.12M	5L-5P.default.12M	5L-10P.default.12M	5L-15P.default.12M	5L-20P.default.12M	10L-0P.default.12M	10L-5P.default.12M	10L-10P.default.12M	10L-15P.default.12M	10L-20P.default.12M	15L-0P.default.12M	15L-5P.default.12M	15L-10P.default.12M	15L-15P.default.12M	15L-20P.default.12M	20L-0P.default.12M	20L-5P.default.12M	20L-10P.default.12M	20L-15P.default.12M	20L-20P.default.12M	0L-5P.default.9M	0L-10P.default.9M	0L-15P.default.9M	0L-20P.default.9M	5L-0P.default.9M	5L-5P.default.9M	5L-10P.default.9M	5L-15P.default.9M	5L-20P.default.9M	10L-0P.default.9M	10L-5P.default.9M	10L-10P.default.9M	10L-15P.default.9M	10L-20P.default.9M	15L-0P.default.9M	15L-5P.default.9M	15L-10P.default.9M	15L-15P.default.9M	15L-20P.default.9M	20L-0P.default.9M	20L-5P.default.9M	20L-10P.default.9M	20L-15P.default.9M	20L-20P.default.9M	0L-5P.default.6M
[Scaffolds]
TotalScaffolds	241	149	168	178	1918	34	120	186	213	538	74	181	248	230	398	152	291	339	221	343	232	312	313	207	200	120	114	128	1531	29	90	130	160	445	80	134	188	164	307	144	208	231	167	302	203	248	231	152	131
TotalContigsInScaffolds	5336	842	281	230	1918	336	177	209	240	538	115	201	283	257	398	175	337	386	255	343	266	363	363	246	3918	690	219	159	1531	288	130	199	187	445	116	151	215	191	307	170	253	272	208	302	238	298	281	176	2555
MeanContigsPerScaffold	22.14	5.65	1.67	1.29	1	9.88	1.48	1.12	1.13	1	1.55	1.11	1.14	1.12	1	1.15	1.16	1.14	1.15	1	1.15	1.16	1.16	1.19	19.59	5.75	1.92	1.24	1	9.93	1.44	1.53	1.17	1	1.45	1.13	1.14	1.16	1	1.18	1.22	1.18	1.25	1	1.17	1.2	1.22	1.16	19.5
MinContigsPerScaffold	1	1	1	1	1	1	1	1	1	1	1	1	1	1	1	1	1	1	1	1	1	1	1	1	1	1	1	1	1	1	1	1	1	1	1	1	1	1	1	1	1	1	1	1	1	1	1	1	1
MaxContigsPerScaffold	250	38	12	7	1	42	5	5	5	1	6	5	4	5	1	5	4	5	4	1	5	7	4	5	144	41	13	5	1	43	6	50	3	1	6	4	4	4	1	5	5	3	5	1	6	5	4	4	125
TotalBasesInScaffolds	10244917	10911251	9945283	9501498	10291445	11917059	10950506	10060655	9533415	11891279	11995522	10627526	9856957	9346474	11849327	10872074	10310490	9558557	9133454	9822343	10530870	9864866	9327177	8957819	7423117	7994172	7495205	7066199	7824324	8909455	8251807	7562855	7165291	8909321	8656202	7911860	7363994	6999511	8803048	8306475	7581571	7093439	6812317	7459823	7846795	7284829	6930542	6673675	4967038
MeanBasesInScaffolds	42510	73230	59198	53379	5366	350502	91254	54090	44758	22103	162102	58716	39746	40637	29772	71527	35431	28196	41328	28637	45392	31618	29799	43274	37116	66618	65747	55205	5111	307223	91687	58176	44783	20021	108203	59044	39170	42680	28674	57684	36450	30708	40792	24701	38654	29374	30002	43906	37916
MinBasesInScaffolds	70	278	1009	1000	1002	1025	1003	1008	1001	1011	1076	1004	1002	1000	1016	1028	1002	1000	1001	1018	1009	1002	1000	1000	112	1011	1003	1005	1004	538	1104	1006	1002	1012	1000	1001	1001	1000	1008	1009	865	1000	1000	1000	1003	1000	1000	1000	90
MaxBasesInScaffolds	400976	501519	490353	484101	80343	2183986	506283	487541	479752	246881	960537	504011	484340	476010	460129	514307	479913	472789	367851	501111	487391	479775	366963	367158	236490	484097	484694	471440	117732	2317013	483304	471617	479475	218144	512028	499887	289436	409985	307381	517426	483227	324017	409747	225014	488364	476268	474041	408684	238747
N25ScaffoldBases	151144	281628	186387	221484	15594	1960274	391535	331162	247236	90988	596317	332042	241431	221622	115068	362377	248829	229200	179953	103157	319337	321277	181330	162938	136415	203131	246587	223003	18439	2317013	261889	193711	233584	94942	359181	328357	225349	168285	100537	248321	236063	225083	161522	89494	234515	226346	140640	135085	132240
N50ScaffoldBases	91102	120744	116200	111892	7975	1479070	179942	121851	118380	50842	326502	125169	119856	113935	68270	147618	114618	112373	109550	65426	119657	115780	112438	105096	78634	120946	117634	115031	7332	1036420	137422	121288	112527	49678	205131	122411	117061	110965	62633	121006	117437	116024	105963	57771	109917	114527	107274	103883	74260
N75ScaffoldBases	46717	82273	80825	78685	4068	821998	100100	81184	78478	25539	167218	84368	79974	75122	32863	91072	79571	76260	75656	38202	79068	74462	77715	74869	47076	79574	80926	83853	3895	546981	103815	81227	78423	23269	119083	86142	79891	76735	33348	78739	79989	78086	73366	32092	75785	76442	74436	71744	41671
TotalSpanOfScaffolds	10903715	10954005	9957928	9521063	10291445	11950629	10959548	10074520	9549672	11891279	12013197	10637908	9877049	9370213	11849327	10886590	10347621	9593677	9160916	9822343	10545796	9909366	9372297	8977012	7927024	8031357	7505561	7073061	7824324	8940721	8256777	7561301	7182015	8909321	8663847	7918958	7382049	7019439	8803048	8313744	7614038	7123741	6833818	7459823	7863163	7323093	6968456	6678469	5283139
MeanSpanOfScaffolds	45244	73517	59273	53489	5366	351489	91330	54164	44834	22103	162340	58773	39827	40740	29772	71622	35559	28300	41452	28637	45456	31761	29943	43367	39635	66928	65838	55258	5111	308301	91742	58164	44888	20021	108298	59097	39266	42801	28674	57734	36606	30839	40921	24701	38735	29529	30166	43937	40329
MinScaffoldSpan	70	278	1009	`	1002	1025	1003	1008	1001	1011	1076	1004	1002	1000	1016	1028	1002	1000	1001	1018	1009	1002	1000	1000	112	1011	1003	1005	1004	538	1104	1006	1002	1012	1000	1001	1001	1000	1008	1009	865	1000	1000	1000	1003	1000	1000	1000	90
MaxScaffoldSpan	428458	503684	490669	484344	80343	2188643	506346	487541	479752	246881	960571	504011	484340	475990	460129	514307	479913	472789	368114	501111	487391	479775	366963	367158	246822	485973	485137	471721	117732	2319818	483441	471743	479599	218144	512028	499887	289436	410018	307381	517426	483227	324017	409747	225014	488364	480157	474353	408664	252895
IntraScaffoldGaps	5095	693	113	52	0	302	57	23	27	0	41	20	35	27	0	23	46	47	34	0	34	51	50	39	3718	570	105	31	0	259	40	69	27	0	36	17	27	27	0	26	45	41	41	0	35	50	50	24	2424
2KbScaffolds	198	134	129	116	1390	26	105	130	112	449	69	138	140	113	330	130	182	139	109	262	166	164	124	105	161	105	95	82	1082	21	80	96	95	369	67	102	108	82	257	121	130	96	84	228	138	124	90	84	108
2KbScaffoldSpan	10857274	10936539	9906988	9444445	9510716	11940551	10937500	9999250	9420341	11765655	12006856	10579880	9740055	9228169	11753619	10854475	10208583	9355865	9031404	9707286	10459483	9723893	9152530	8862403	7881737	8011960	7481449	7014965	7174726	8931882	8242432	7515629	7100359	8800343	8648035	7879589	7282928	6923144	8737380	8282744	7514369	6963988	6740464	7363540	7776951	7167742	6805628	6603005	5256069
MeanSequenceGapLength	129	62	112	376	0	111	159	603	602	0	431	519	574	879	0	631	807	747	808	0	439	873	902	492	136	65	99	221	0	121	124	-23	619	0	212	418	669	738	0	280	721	739	524	0	468	765	758	200	130
[Contigs]
TotalContigsInScaffolds	5336	842	281	230	1918	336	177	209	240	538	115	201	283	257	398	175	337	386	255	343	266	363	363	246	3918	690	219	159	1531	288	130	199	187	445	116	151	215	191	307	170	253	272	208	302	238	298	281	176	2555
TotalBasesInScaffolds	10244917	10911251	9945283	9501498	10291445	11917059	10950506	10060655	9533415	11891279	11995522	10627526	9856957	9346474	11849327	10872074	10310490	9558557	9133454	9822343	10530870	9864866	9327177	8957819	7423117	7994172	7495205	7066199	7824324	8909455	8251807	7562855	7165291	8909321	8656202	7911860	7363994	6999511	8803048	8306475	7581571	7093439	6812317	7459823	7846795	7284829	6930542	6673675	4967038
TotalVarRecords	10746	24063	42820	62767	10953	44763	51104	70420	90225	42333	68310	72949	93594	110632	81414	77242	97250	115264	130773	70369	88197	106874	125022	138084	7973	17891	32190	46461	8526	33488	37402	52388	67349	31784	40711	53257	69385	82708	59891	57660	71916	85988	97137	56047	67211	81080	94497	103645	5233
MeanContigLength	1920	12959	35392	41311	5366	35467	61867	48137	39723	22103	104309	52873	34830	36368	29772	62126	30595	24763	35817	28637	39590	27176	25695	36414	1895	11586	34225	44442	5111	30936	63475	38004	38317	20021	74622	52396	34251	36647	28674	48862	29967	26079	32752	24701	32970	24446	24664	37919	1944
MinContigLength	64	70	70	146	1002	88	93	793	1001	1011	658	564	811	350	1016	1015	1002	73	925	1018	1009	131	103	164	64	80	92	291	1004	132	88	64	163	1012	1000	1001	1001	814	1008	1009	252	879	129	1000	1003	1000	73	299	64
MaxContigLength	52597	89967	345603	372281	80343	329888	504429	487541	479752	246881	706467	504011	484340	325917	460129	514307	479913	472789	302735	501111	487391	479775	366963	367158	60780	103304	339685	365784	117732	419303	372346	369290	362146	218144	512028	499887	289436	327436	307381	517426	483227	324017	409747	225014	488364	326959	247454	237890	49818
N25ContigBases	10791	38874	123201	186196	15594	137138	211548	229965	245619	90988	542401	243078	236108	221622	115068	362377	232660	229200	166016	103157	290754	321277	166015	162938	9492	36230	120961	138733	18439	133232	170576	171047	169390	94942	268147	321301	225349	161565	100537	248321	227947	223258	135929	89494	179898	165732	133379	130392	10157
N50ContigBases	3010	24417	86055	106704	7975	78454	125901	121383	116250	50842	209592	124960	115521	113935	68270	131055	111055	109020	105422	65426	110349	109217	106585	103463	2967	23026	80926	108070	7332	82456	114299	118067	110115	49678	137874	120079	113372	110965	62633	109989	112580	110442	101427	57771	107361	106960	102493	100226	3160
N75ContigBases	1602	13446	51327	71531	4068	48210	74459	77408	76724	25539	117436	78499	77561	74492	32863	81087	71033	71972	72151	38202	75792	71301	71228	70329	1552	12832	47562	76018	3895	35213	66399	78418	77490	23269	79405	78485	75797	75811	33348	68280	72803	68949	65810	32092	64739	71764	68023	63134	1614
TotalBigContigs	129	377	163	109	214	194	126	102	92	273	89	117	99	97	223	112	111	100	102	181	131	99	103	107	83	276	136	84	139	158	105	84	77	195	85	89	77	77	168	108	80	76	85	148	100	80	85	93	68
BigContigLength	2674539	9182012	9674312	9248418	4168404	11399342	10770886	9750925	9236983	10926202	11918977	10354048	9431169	9094166	11162011	10654180	9683838	9087659	8918293	9334890	407216	9261310	8957564	8765421	1812300	6547449	7234345	6923618	2946916	8429056	8180759	7368740	6945032	7953001	8574287	7737390	7052419	6842021	8260543	8063296	7101591	6762531	6648857	6966974	7395492	6809526	6651469	6545282	1269925
MeanBigContigLength	20733	24355	59352	84848	19479	58759	85483	95597	100402	40023	133921	88496	95264	93754	50054	95127	87242	90877	87434	51574	3109	93549	86967	81920	21835	23723	53194	82424	21201	53348	77912	87723	90195	40785	100874	86937	91590	88857	49170	74660	88770	88981	78222	47074	73955	85119	78253	70379	18675
MinBigContig	10104	10146	10019	12371	10010	10077	10735	10021	12242	10141	10831	10118	10198	12505	10378	10103	10023	10063	10826	10344	1009	10085	11150	10340	10724	10048	10076	11079	10003	10117	10548	10239	11514	10091	12006	10992	10289	11463	10028	10065	10183	10353	10809	10168	10354	11119	10195	10637	10035
MaxBigContig	52597	89967	345603	372281	80343	329888	504429	487541	479752	246881	706467	504011	484340	325917	460129	514307	479913	472789	302735	501111	9346	479775	366963	367158	60780	103304	339685	365784	117732	419303	372346	369290	362146	218144	512028	499887	289436	327436	307381	517426	483227	324017	409747	225014	488364	326959	247454	237890	49818
BigContigsPercentBases	26.11	84.15	97.28	97.34	40.5	95.66	98.36	96.92	96.89	91.88	99.36	97.43	95.68	97.3	94.2	98	93.92	95.07	97.64	95.04	3.87	93.88	96.04	97.85	24.41	81.9	96.52	97.98	37.66	94.61	99.14	97.43	96.93	89.27	99.05	97.79	95.77	97.75	93.84	97.07	93.67	95.34	97.6	93.39	94.25	93.48	95.97	98.08	25.57
TotalSmallContigs	5207	465	118	121	1704	142	51	107	148	265	26	84	184	160	175	63	226	286	153	162	2974	264	260	139	3835	414	83	75	1392	130	25	115	110	250	31	62	138	114	139	62	173	196	123	154	138	218	196	83	2487
SmallContigLength	7570378	1729239	270971	253080	6123041	517717	179620	309730	296432	965077	76545	273478	425788	252308	687316	217894	626652	470898	215161	487453	3041029	603556	369613	192398	5610817	1446723	260860	142581	4877408	480399	71048	194115	220259	956320	81915	174470	311575	157490	542505	243179	479980	330908	163460	492849	451303	475303	279073	128393	3697113
MeanSmallContigLength	1454	3719	2296	2092	3593	3646	3522	2895	2003	3642	2944	3256	2314	1577	3928	3459	2773	1646	1406	3009	29783	2286	1422	1384	1463	3494	3143	1901	3504	3695	2842	1688	2002	3825	2642	2814	2258	1381	3903	3922	2774	1688	1329	3200	3270	2180	1424	1547	1487
MinSmallContig	64	70	70	146	1002	88	93	793	1001	1011	658	564	811	350	1016	1015	1002	73	925	1018	1023	131	103	164	64	80	92	291	1004	132	88	64	163	1012	1000	1001	1001	814	1008	1009	252	879	129	1000	1003	1000	73	299	64
MaxSmallContig	9978	9982	9949	9889	9994	9896	9824	9963	9789	9705	8628	9609	9299	7513	9902	9903	9471	9061	8848	9902	174	9630	9888	9159	9954	9987	9489	9112	9958	9960	9898	8273	6969	9981	9163	9371	9810	6920	9632	9842	9973	9232	8706	9696	9786	9630	8703	9267	9782
SmallContigsPercentBases	73.89	15.85	2.72	2.66	59.5	4.34	1.64	3.08	3.11	8.12	0.64	2.57	4.32	2.7	5.8	2	6.08	4.93	2.36	4.96	19059	6.12	3.96	2.15	75.59	18.1	3.48	2.02	62.34	5.39	0.86	2.57	3.07	10.73	0.95	2.21	4.23	2.25	6.16	2.93	6.33	4.66	2.4	6.61	5.75	6.52	4.03	1.92	74.43
[DegenContigs]
TotalDegenContigs	2479	1308	3740	8738	952	318	963	2999	6799	466	611	1998	5050	9797	733	1771	4373	8806	14156	1439	reads,bases,EUID]	6536	11676	17715	2304	1306	3018	6947	810	293	812	2412	5474	397	671	1639	4023	7699	647	1531	3621	7215	11394	1285	2736	5759	9757	14318	1666
DegenContigLength	1300190	1506379	2895536	4484457	1530604	173343	1573500	3107500	4968338	299484	605933	2404338	4327628	6699830	546474	2118856	3823784	6408678	9045805	2868696	37885,487391,7180000017130	5198339	7912459	10806845	1180246	1302474	2166362	3511204	1043126	170728	1197542	2415650	3832845	272500	906704	1876821	3355737	5168869	538726	1622378	3150915	5132449	7146085	2165717	2550384	4377047	6446727	8607369	803765
DegenVarRecords	1615	7771	22429	33249	3166	288	14453	29443	37274	727	4171	23663	36407	40419	2772	21584	32075	41861	41412	33727	36925,486407,7180000017101	39814	43687	40438	1417	6450	16193	25805	1954	355	10541	22168	27166	723	7440	17937	27306	29968	3153	15057	26297	31510	30210	24937	22976	31051	32800	29942	850
MeanDegenContigLength	524	1152	774	513	1608	545	1634	1036	731	643	992	1203	857	684	746	1196	874	728	639	1994	28678,370382,7180000017122	795	678	610	512	997	718	505	1288	583	1475	1002	700	686	1351	1145	834	671	833	1060	870	711	627	1685	932	760	661	601	482
MinDegenContig	65	67	69	67	66	66	69	75	67	77	77	75	75	91	78	170	80	80	91	99	25928,347877,7180000017078	80	73	86	64	77	66	105	64	80	89	130	97	81	77	130	94	97	85	103	98	94	97	85	192	98	94	97	68
MaxDegenContig	21365	26557	12978	6631	86536	10991	24047	14786	7283	22891	35599	17694	10916	7343	37660	23777	12203	7958	4928	38021	26710,344708,7180000017113	9845	7254	4967	19493	41578	17287	7111	79429	9244	32211	12413	7507	18450	46621	23589	11978	6571	18630	21020	12582	7924	5884	37959	16916	8967	6218	4406	14975
DegenPercentBases	12.69	13.81	29.11	47.2	14.87	1.45	14.37	30.89	52.11	2.52	5.05	22.62	43.9	71.68	4.61	19.49	37.09	67.05	99.04	29.21	156126,2036765	52.7	84.83	120.64	15.9	16.29	28.9	49.69	13.33	1.92	14.51	31.94	53.49	3.06	10.47	23.72	45.57	73.85	6.12	19.53	41.56	72.35	104.9	29.03	32.5	60.08	93.02	128.97	16.18
[UniqueUnitigs]																					442
TotalUUnitigs	18506	17296	23942	40631	1918	11406	15890	31507	57588	538	9118	19971	39267	68079	398	9093	25404	46293	85671	343	478	27053	53334	94686	13769	13239	18271	30283	1531	9282	13360	25744	44946	445	5966	14975	30776	54570	307	6728	18784	36762	66623	302	7568	20159	40680	75564	9391
MinUUnitigLength	64	64	64	64	1022	64	64	64	64	1041	64	64	64	64	1030	64	64	64	64	1075	1414037	64	64	64	64	64	64	64	1012	64	64	64	64	1034	64	64	64	64	1045	64	64	64	64	1045	64	64	64	64	64
MaxUUnitigLength	28001	43309	52071	47218	83060	120147	125955	82577	60389	261284	236324	119909	94641	53965	487966	276117	125179	75397	48252	536831	1443659	76872	75082	47237	40742	36138	53893	39409	122300	98621	153553	100201	60906	227340	126306	120668	80121	56310	327500	127337	80607	84194	50727	241179	125211	71544	76879	48705	22034
MeanUUnitigLength	618	670	525	370	5498	1218	780	465	327	23162	1419	656	410	304	31830	1263	554	374	275	30716	45444849	530	347	264	613	654	517	368	5237	1126	705	436	319	20975	1444	649	397	295	30646	1278	557	362	270	26542	1148	530	343	256	594
SDUUnitigLength	1211	2014	2201	1539	7233	5453	4608	2719	1540	32122	8739	4345	2379	1330	47341	7783	3541	1916	1048	45762	1675931	3048	1605	919	1230	2016	2246	1553	7405	5000	4309	2575	1431	31562	7982	4403	2234	1248	41538	7393	3343	1823	1004	35754	6321	2936	1571	849	1141
[Surrogates]																					21559
TotalSurrogates	538	830	1194	1809	0	295	482	850	1325	0	215	534	845	1220	0	362	631	773	1104	0	3199	598	797	1102	421	618	911	1291	0	260	402	716	1020	0	216	404	647	959	0	276	443	598	889	0	333	446	582	905	361
SurrogateInstances	575	937	1294	1887	0	317	515	895	1361	0	253	574	872	1249	0	395	653	793	1128	0	3348	614	813	1114	441	684	970	1344	0	283	433	768	1059	0	244	428	665	976	0	311	459	613	898	0	359	458	592	912	388
SurrogateLength	592637	1654727	1162147	1069154	0	182498	1471573	1231306	1088861	0	905955	1430791	1090052	996342	0	1625057	1313445	874168	857885	0		1008853	737717	806831	382463	1135240	929259	766761	0	171062	1211597	950423	875418	0	1209222	1136035	832652	749039	0	1291912	870015	621742	670571	0	1035135	678827	520318	650808	320180
SurrogateInstanceLength	694676	1866093	1210667	1091711	0	219829	1562316	1241366	1101874	0	1193712	1497914	1081079	1013536	0	1645333	1299150	868750	877231	0		977896	737108	822635	402528	1234994	951484	793334	0	197094	1305686	1003699	883566	0	1410730	1139966	817428	754325	0	1395091	871377	617635	675882	0	1050080	646634	518153	662491	371725
UnPlacedSurrReadLen	3712666	22660260	17501251	14863493	0	1928788	31481035	26189729	18287690	0	21079418	37613988	25323267	17086949	0	49239951	39658274	20962505	13445162	0	807174(67.27%)	30834636	15190152	11386507	2220749	15145495	14446525	10694060	0	1871950	26048808	19290439	15361828	0	28705601	30593015	19642376	12477955	0	39131421	25379147	13852100	10090549	0	33715188	19926935	10462113	8804130	1912561
PlacedSurrReadLen	1309644	4412936	6228971	6214350	0	257599	3115213	4768864	4678145	0	1140989	3356388	3500123	3035233	0	1558991	2655260	2269230	2111022	0	228918(19.08%)	1982211	1719644	1680138	967390	3143584	4791020	4560136	0	234496	2391390	3543569	3579774	0	1000567	2489497	2797394	2228296	0	1408536	1925804	1570912	1533814	0	1262923	1263908	1135570	1276086	730652
MinSurrogateLength	75	71	71	89	0	66	72	82	89	0	76	75	122	133	0	86	102	235	158	0	436(0.04%)	104	230	158	72	66	72	74	0	66	66	66	74	0	72	77	98	155	0	99	241	161	155	0	99	241	204	200	78
MaxSurrogateLength	20236	35816	13468	5568	0	15628	52636	13166	7887	0	46089	23043	9330	6477	0	43853	13116	10232	5133	0	32(0.00%)	13267	5461	4723	17153	33091	16330	6595	0	19677	39855	15928	7370	0	61765	26066	11113	7584	0	28352	13095	6867	5582	0	21055	8694	5798	5642	21061
MeanSurrogateLength	1102	1994	973	591	0	619	3053	1449	822	0	4214	2679	1290	817	0	4489	2082	1131	777	0	0(0.00%)	1687	926	732	908	1837	1020	594	0	658	3014	1327	858	0	5598	2812	1287	781	0	4681	1964	1040	754	0	3109	1522	894	719	887
SDSurrogateLength	2483	4283	1530	652	0	1439	5385	2012	857	0	7223	3458	1418	692	0	5746	2191	1162	538	0	8(0.00%)	1805	746	448	1786	3896	1633	670	0	1833	5766	1889	935	0	8942	3806	1472	692	0	4944	1993	953	561	0	3067	1495	745	496	2049
[Mates]																					42018(3.50%)
ReadsWithNoMate	41379(9.83%)	78390(9.27%)	114241(8.98%)	147882(8.68%)	209478(100.00%)	247625(39.05%)	284376(26.78%)	319701(21.44%)	353910(18.42%)	422574(100.00%)	460594(54.16%)	496520(38.80%)	531477(31.10%)	566040(26.48%)	639145(100.00%)	675839(63.29%)	710886(47.49%)	745685(38.73%)	780279(33.14%)	771307(100.00%)	81816(6.82%)	841938(51.69%)	876714(42.61%)	911336(36.66%)	32125(10.22%)	60197(9.52%)	87260(9.16%)	112830(8.85%)	156489(100.00%)	186078(39.26%)	214296(26.98%)	240802(21.57%)	266729(18.54%)	316133(100.00%)	345657(54.32%)	372874(38.91%)	399200(31.19%)	425464(26.57%)	478665(100.00%)	506901(63.39%)	533362(47.57%)	559909(38.82%)	585865(33.22%)	593021(100.00%)	620500(67.90%)	646730(52.35%)	672925(43.23%)	699196(37.24%)	21668(10.38%)
ReadsWithGoodMate	279880(66.52%)	457000(54.05%)	648288(50.94%)	850326(49.94%)	0(0.00%)	372112(58.69%)	497018(46.80%)	671930(45.06%)	861724(44.86%)	0(0.00%)	320758(37.72%)	470994(36.81%)	666024(38.98%)	851890(39.85%)	0(0.00%)	240476(22.52%)	452190(30.21%)	643584(33.42%)	839046(35.64%)	0(0.00%)	6212(0.52%)	439046(26.96%)	639260(31.07%)	822836(33.10%)	203558(64.79%)	336384(53.20%)	482050(50.61%)	624352(48.99%)	0(0.00%)	273846(57.78%)	362746(45.66%)	500970(44.87%)	638678(44.40%)	0(0.00%)	196972(30.96%)	343776(35.88%)	491920(38.43%)	637088(39.79%)	0(0.00%)	175882(21.99%)	332842(29.68%)	479230(33.23%)	620052(35.16%)	0(0.00%)	167636(18.34%)	323502(26.19%)	470410(30.22%)	605352(32.24%)	132474(63.43%)
ReadsWithBadShortMate	2018(0.48%)	2848(0.34%)	4162(0.33%)	3948(0.23%)	0(0.00%)	1004(0.16%)	2054(0.19%)	1882(0.13%)	2030(0.11%)	0(0.00%)	950(0.11%)	1362(0.11%)	1896(0.11%)	1434(0.07%)	0(0.00%)	558(0.05%)	612(0.04%)	678(0.04%)	316(0.01%)	0(0.00%)	0(0.00%)	256(0.02%)	368(0.02%)	736(0.03%)	1096(0.35%)	2550(0.40%)	3170(0.33%)	3114(0.24%)	0(0.00%)	900(0.19%)	1562(0.20%)	1478(0.13%)	1208(0.08%)	0(0.00%)	452(0.07%)	1156(0.12%)	1094(0.09%)	772(0.05%)	0(0.00%)	446(0.06%)	222(0.02%)	622(0.04%)	958(0.05%)	0(0.00%)	290(0.03%)	162(0.01%)	570(0.04%)	750(0.04%)	596(0.29%)
ReadsWithBadLongMate	302(0.07%)	122(0.01%)	94(0.01%)	134(0.01%)	0(0.00%)	132(0.02%)	126(0.01%)	272(0.02%)	170(0.01%)	0(0.00%)	62(0.01%)	166(0.01%)	104(0.01%)	126(0.01%)	0(0.00%)	26(0.00%)	48(0.00%)	44(0.00%)	122(0.01%)	0(0.00%)	24164(2.01%)	42(0.00%)	50(0.00%)	78(0.00%)	90(0.03%)	534(0.08%)	96(0.01%)	88(0.01%)	0(0.00%)	94(0.02%)	104(0.01%)	264(0.02%)	142(0.01%)	0(0.00%)	44(0.01%)	110(0.01%)	172(0.01%)	132(0.01%)	0(0.00%)	42(0.01%)	74(0.01%)	74(0.01%)	86(0.00%)	0(0.00%)	28(0.00%)	64(0.01%)	198(0.01%)	102(0.01%)	80(0.04%)
ReadsWithSameOrientMate	12(0.00%)	20(0.00%)	20(0.00%)	20(0.00%)	0(0.00%)	72(0.01%)	6(0.00%)	4(0.00%)	12(0.00%)	0(0.00%)	0(0.00%)	4(0.00%)	16(0.00%)	36(0.00%)	0(0.00%)	0(0.00%)	2(0.00%)	6(0.00%)	2(0.00%)	0(0.00%)	106(0.01%)	0(0.00%)	2(0.00%)	2(0.00%)	22(0.01%)	10(0.00%)	26(0.00%)	4(0.00%)	0(0.00%)	14(0.00%)	4(0.00%)	10(0.00%)	6(0.00%)	0(0.00%)	2(0.00%)	4(0.00%)	2(0.00%)	2(0.00%)	0(0.00%)	0(0.00%)	0(0.00%)	4(0.00%)	0(0.00%)	0(0.00%)	0(0.00%)	0(0.00%)	2(0.00%)	0(0.00%)	12(0.01%)
ReadsWithOuttieMate	16(0.00%)	38(0.00%)	22(0.00%)	52(0.00%)	0(0.00%)	46(0.01%)	38(0.00%)	52(0.00%)	46(0.00%)	0(0.00%)	34(0.00%)	34(0.00%)	22(0.00%)	34(0.00%)	0(0.00%)	4(0.00%)	8(0.00%)	4(0.00%)	8(0.00%)	0(0.00%)	0(0.00%)	0(0.00%)	10(0.00%)	4(0.00%)	28(0.01%)	82(0.01%)	14(0.00%)	40(0.00%)	0(0.00%)	52(0.01%)	62(0.01%)	72(0.01%)	262(0.02%)	0(0.00%)	20(0.00%)	24(0.00%)	46(0.00%)	36(0.00%)	0(0.00%)	16(0.00%)	16(0.00%)	20(0.00%)	16(0.00%)	0(0.00%)	8(0.00%)	12(0.00%)	8(0.00%)	40(0.00%)	10(0.00%)
ReadsWithBothChaffMate	1362(0.32%)	2294(0.27%)	8562(0.67%)	29466(1.73%)	0(0.00%)	1744(0.28%)	5892(0.55%)	25142(1.69%)	84000(4.37%)	0(0.00%)	2522(0.30%)	12872(1.01%)	52864(3.09%)	156184(7.31%)	0(0.00%)	5158(0.48%)	31432(2.10%)	111184(5.77%)	265886(11.29%)	0(0.00%)	0	49908(3.06%)	154822(7.53%)	336730(13.55%)	1280(0.41%)	2490(0.39%)	7546(0.79%)	24436(1.92%)	0(0.00%)	1874(0.40%)	5808(0.73%)	21356(1.91%)	66900(4.65%)	0(0.00%)	2706(0.43%)	11442(1.19%)	43980(3.44%)	125702(7.85%)	0(0.00%)	5168(0.65%)	27504(2.45%)	93114(6.46%)	215342(12.21%)	0(0.00%)	9396(1.03%)	45720(3.70%)	133246(8.56%)	275378(14.67%)	1036(0.50%)
ReadsWithChaffMate	14928(3.55%)	24262(2.87%)	79064(6.21%)	199176(11.70%)	0(0.00%)	3520(0.56%)	36324(3.42%)	126902(8.51%)	271022(14.11%)	0(0.00%)	8844(1.04%)	66186(5.17%)	186120(10.89%)	326362(15.27%)	0(0.00%)	27870(2.61%)	113494(7.58%)	241484(12.54%)	329742(14.01%)	0(0.00%)	0	138546(8.51%)	251328(12.22%)	317356(12.77%)	13216(4.21%)	22016(3.48%)	63028(6.62%)	153490(12.04%)	0(0.00%)	3264(0.69%)	28972(3.65%)	96712(8.66%)	208654(14.50%)	0(0.00%)	10648(1.67%)	52110(5.44%)	139338(10.89%)	239782(14.97%)	0(0.00%)	23326(2.92%)	88478(7.89%)	180704(12.53%)	245014(13.89%)	0(0.00%)	35756(3.91%)	109424(8.86%)	186424(11.98%)	230336(12.27%)	9508(4.55%)
ReadsWithBothDegenMate	37780(8.98%)	200406(23.70%)	322110(25.31%)	374758(22.01%)	0(0.00%)	2978(0.47%)	180004(16.95%)	264986(17.77%)	268424(13.97%)	0(0.00%)	29230(3.44%)	171450(13.40%)	203780(11.93%)	180926(8.46%)	0(0.00%)	90034(8.43%)	134210(8.97%)	131852(6.85%)	102888(4.37%)	0(0.00%)		117378(7.21%)	98326(4.78%)	69414(2.79%)	32076(10.21%)	151608(23.98%)	237246(24.91%)	283630(22.25%)	0(0.00%)	4026(0.85%)	136492(17.18%)	195218(17.49%)	198888(13.83%)	0(0.00%)	55200(8.68%)	134864(14.07%)	155430(12.14%)	135800(8.48%)	0(0.00%)	61408(7.68%)	100140(8.93%)	95788(6.64%)	72560(4.11%)	0(0.00%)	57046(6.24%)	80336(6.50%)	68068(4.37%)	47574(2.53%)	19020(9.11%)
ReadsWithDegenMate	22832(5.43%)	9982(1.18%)	20866(1.64%)	27846(1.64%)	0(0.00%)	402(0.06%)	6822(0.64%)	20394(1.37%)	27708(1.44%)	0(0.00%)	1012(0.12%)	11076(0.87%)	24054(1.41%)	20902(0.98%)	0(0.00%)	3874(0.36%)	18382(1.23%)	25328(1.32%)	13890(0.59%)	0(0.00%)		17204(1.06%)	17804(0.87%)	10092(0.41%)	18760(5.97%)	9666(1.53%)	12602(1.32%)	20066(1.57%)	0(0.00%)	522(0.11%)	3358(0.42%)	10326(0.92%)	17286(1.20%)	0(0.00%)	884(0.14%)	7066(0.74%)	16340(1.28%)	12656(0.79%)	0(0.00%)	2706(0.34%)	11400(1.02%)	14624(1.01%)	8220(0.47%)	0(0.00%)	5356(0.59%)	14876(1.20%)	12344(0.79%)	5866(0.31%)	13828(6.62%)
ReadsWithBothSurrMate	44(0.01%)	18(0.00%)	82(0.01%)	74(0.00%)	0(0.00%)	0(0.00%)	0(0.00%)	12(0.00%)	32(0.00%)	0(0.00%)	0(0.00%)	0(0.00%)	0(0.00%)	0(0.00%)	0(0.00%)	0(0.00%)	0(0.00%)	0(0.00%)	0(0.00%)	0(0.00%)	NA	0(0.00%)	0(0.00%)	0(0.00%)	16(0.01%)	12(0.00%)	44(0.00%)	58(0.00%)	0(0.00%)	0(0.00%)	4(0.00%)	0(0.00%)	6(0.00%)	0(0.00%)	0(0.00%)	0(0.00%)	0(0.00%)	0(0.00%)	0(0.00%)	0(0.00%)	0(0.00%)	0(0.00%)	0(0.00%)	0(0.00%)	0(0.00%)	0(0.00%)	0(0.00%)	0(0.00%)	40(0.02%)
ReadsWithSurrogateMate	18928(4.50%)	69684(8.24%)	74928(5.89%)	68678(4.03%)	0(0.00%)	4052(0.64%)	49166(4.63%)	59678(4.00%)	51064(2.66%)	0(0.00%)	26268(3.09%)	48772(3.81%)	42204(2.47%)	33588(1.57%)	0(0.00%)	23958(2.24%)	35430(2.37%)	25610(1.33%)	21936(0.93%)	0(0.00%)	1199910	24084(1.48%)	18472(0.90%)	17216(0.69%)	11074(3.52%)	46308(7.32%)	59192(6.22%)	52350(4.11%)	0(0.00%)	3154(0.67%)	40828(5.14%)	48788(4.37%)	39690(2.76%)	0(0.00%)	23670(3.72%)	34766(3.63%)	32234(2.52%)	23820(1.49%)	0(0.00%)	23734(2.97%)	27046(2.41%)	18016(1.25%)	15354(0.87%)	0(0.00%)	17854(1.95%)	14454(1.17%)	11998(0.77%)	12824(0.68%)	10212(4.89%)
ReadsWithDiffScafMate	1268(0.30%)	494(0.06%)	256(0.02%)	408(0.02%)	0(0.00%)	380(0.06%)	98(0.01%)	294(0.02%)	872(0.05%)	0(0.00%)	88(0.01%)	222(0.02%)	278(0.02%)	268(0.01%)	0(0.00%)	62(0.01%)	162(0.01%)	112(0.01%)	30(0.00%)	0(0.00%)	296	404(0.02%)	174(0.01%)	32(0.00%)	846(0.27%)	410(0.06%)	124(0.01%)	108(0.01%)	0(0.00%)	154(0.03%)	182(0.02%)	442(0.04%)	142(0.01%)	0(0.00%)	42(0.01%)	50(0.01%)	274(0.02%)	44(0.00%)	0(0.00%)	24(0.00%)	168(0.01%)	92(0.01%)	24(0.00%)	0(0.00%)	40(0.00%)	40(0.00%)	270(0.02%)	12(0.00%)	360(0.17%)
ReadsWithUnassignedMate	0(0.00%)	0(0.00%)	0(0.00%)	0(0.00%)	0(0.00%)	0(0.00%)	0(0.00%)	0(0.00%)	0(0.00%)	0(0.00%)	0(0.00%)	0(0.00%)	0(0.00%)	0(0.00%)	0(0.00%)	0(0.00%)	0(0.00%)	0(0.00%)	0(0.00%)	0(0.00%)	752867(62.74%)	0(0.00%)	0(0.00%)	0(0.00%)	0(0.00%)	0(0.00%)	0(0.00%)	0(0.00%)	0(0.00%)	0(0.00%)	0(0.00%)	0(0.00%)	0(0.00%)	0(0.00%)	0(0.00%)	0(0.00%)	0(0.00%)	0(0.00%)	0(0.00%)	0(0.00%)	0(0.00%)	0(0.00%)	0(0.00%)	0(0.00%)	0(0.00%)	0(0.00%)	0(0.00%)	0(0.00%)	0(0.00%)
TotalScaffoldLinks	22	6	0	0	0	3	1	1	0	0	0	0	0	0	0	0	0	0	0	0	733896(61.16%)	0	0	0	15	2	0	0	0	0	0	0	0	0	0	0	0	0	0	0	0	0	0	0	0	0	0	0	5
MeanScaffoldLinkWeight	7.68	22.83	0	0	0	19	2	33	0	0	0	0	0	0	0	0	0	0	0	0	18971(1.58%)	0	0	0	3.87	31	0	0	0	0	0	0	0	0	0	0	0	0	0	0	0	0	0	0	0	0	0	0	6.4
[Reads]																					156633(13.05%)
TotalReadsInput	NA	NA	NA	NA	NA	NA	NA	NA	NA	NA	NA	NA	NA	NA	NA	NA	NA	NA	NA	NA	10000(0.83%)	NA	NA	NA	NA	NA	NA	NA	NA	NA	NA	NA	NA	NA	NA	NA	NA	NA	NA	NA	NA	NA	NA	NA	NA	NA	NA	NA	NA
TotalUsableReads	420749	845558	1272695	1702768	209478	634067	1061924	1491249	1921014	422574	850362	1279658	1708839	2137790	639145	1067859	1496856	1925571	2354145	771307	73623(6.14%)	1628806	2057330	2485832	314187	632267	952398	1274566	156489	473978	794418	1116438	1438591	316133	636297	958242	1280030	1601298	478665	799653	1121252	1442197	1763491	593021	913910	1235320	1556463	1877430	208844
AvgClearRange	172	174	174	175	367	239	213	203	197	361	268	237	222	213	365	290	257	239	227	362	73622(6.14%)	264	246	234	172	173	174	175	367	238	213	203	197	360	268	237	222	213	366	290	257	239	228	362	297	265	247	235	172
ContigReads	345952(82.22%)	569179(67.31%)	806987(63.41%)	1027617(60.35%)	170555(81.42%)	615162(97.02%)	731083(68.85%)	936100(62.77%)	1135243(59.10%)	410836(97.22%)	722878(85.01%)	835428(65.29%)	1040402(60.88%)	1216812(56.92%)	610627(95.54%)	696476(65.22%)	927842(61.99%)	1112882(57.79%)	1291174(54.85%)	539636(69.96%)		968378(59.45%)	1161155(56.44%)	1323690(53.25%)	253446(80.67%)	422401(66.81%)	602480(63.26%)	755919(59.31%)	130550(83.42%)	455181(96.03%)	537110(67.61%)	697287(62.46%)	844644(58.71%)	305318(96.58%)	452854(71.17%)	611325(63.80%)	771209(60.25%)	907697(56.69%)	449213(93.85%)	518963(64.90%)	683494(60.96%)	826493(57.31%)	954898(54.15%)	421237(71.03%)	566476(61.98%)	723760(58.59%)	865138(55.58%)	982368(52.33%)	167146(80.03%)
BigContigReads	120580(28.66%)	482315(57.04%)	787238(61.86%)	1000114(58.73%)	86256(41.18%)	597019(94.16%)	721976(67.99%)	911478(61.12%)	1104181(57.48%)	385665(91.27%)	719243(84.58%)	821861(64.23%)	1006824(58.92%)	1190596(55.69%)	573822(89.78%)	687473(64.38%)	890664(59.50%)	1070818(55.61%)	1266670(53.81%)	513557(66.58%)		928182(56.99%)	1123953(54.63%)	1301795(52.37%)	87588(27.88%)	349473(55.27%)	583525(61.27%)	739605(58.03%)	63284(40.44%)	438294(92.47%)	534316(67.26%)	684761(61.33%)	822770(57.19%)	279572(88.43%)	449163(70.59%)	602022(62.83%)	745437(58.24%)	891087(55.65%)	420971(87.95%)	508485(63.59%)	654154(58.34%)	797654(55.31%)	937287(53.15%)	392859(66.25%)	544209(59.55%)	690518(55.90%)	836064(53.72%)	968787(51.60%)	56875(27.23%)
SmallContigReads	225372(53.56%)	86864(10.27%)	19749(1.55%)	27503(1.62%)	84299(40.24%)	18143(2.86%)	9107(0.86%)	24622(1.65%)	31062(1.62%)	25171(5.96%)	3635(0.43%)	13567(1.06%)	33578(1.96%)	26216(1.23%)	36805(5.76%)	9003(0.84%)	37178(2.48%)	42064(2.18%)	24504(1.04%)	26079(3.38%)	21.1	40196(2.47%)	37202(1.81%)	21895(0.88%)	165858(52.79%)	72928(11.53%)	18955(1.99%)	16314(1.28%)	67266(42.98%)	16887(3.56%)	2794(0.35%)	12526(1.12%)	21874(1.52%)	25746(8.14%)	3691(0.58%)	9303(0.97%)	25772(2.01%)	16610(1.04%)	28242(5.90%)	10478(1.31%)	29340(2.62%)	28839(2.00%)	17611(1.00%)	28378(4.79%)	22267(2.44%)	33242(2.69%)	29074(1.87%)	13581(0.72%)	110271(52.80%)
DegenContigReads	43379(10.31%)	131791(15.59%)	317786(24.97%)	460436(27.04%)	33318(15.91%)	3029(0.48%)	155459(14.64%)	324863(21.78%)	441063(22.96%)	5656(1.34%)	35507(4.18%)	225240(17.60%)	370658(21.69%)	446543(20.89%)	17894(2.80%)	163602(15.32%)	281825(18.83%)	402827(20.92%)	431177(18.32%)	212591(27.56%)	25.41	347132(21.31%)	420325(20.43%)	421568(16.96%)	38719(12.32%)	109279(17.28%)	227792(23.92%)	354558(27.82%)	21201(13.55%)	3739(0.79%)	112066(14.11%)	244466(21.90%)	319211(22.19%)	5398(1.71%)	62924(9.89%)	169003(17.64%)	276658(21.61%)	330772(20.66%)	20049(4.19%)	113327(14.17%)	230267(20.54%)	302536(20.98%)	314580(17.84%)	154748(26.09%)	173319(18.96%)	269235(21.79%)	311556(20.02%)	307410(16.37%)	24204(11.59%)
SurrogateReads	28633(6.81%)	154187(18.23%)	132798(10.43%)	113941(6.69%)	0(0.00%)	8910(1.41%)	161177(15.18%)	149831(10.05%)	110799(5.77%)	0(0.00%)	82245(9.67%)	170553(13.33%)	125023(7.32%)	87539(4.09%)	0(0.00%)	173616(16.26%)	159760(10.67%)	91373(4.75%)	60793(2.58%)	0(0.00%)	24.91	119445(7.33%)	62537(3.04%)	48196(1.94%)	18181(5.79%)	104242(16.49%)	108058(11.35%)	82769(6.49%)	0(0.00%)	8571(1.81%)	132385(16.66%)	110362(9.89%)	91959(6.39%)	0(0.00%)	109996(17.29%)	137294(14.33%)	97408(7.61%)	63912(3.99%)	0(0.00%)	138260(17.29%)	103242(9.21%)	60277(4.18%)	45221(2.56%)	0(0.00%)	115724(12.66%)	76338(6.18%)	42665(2.74%)	37107(1.98%)	14980(7.17%)
PlacedSurrogateReads	7658(1.82%)	25774(3.05%)	36167(2.84%)	34405(2.02%)	0(0.00%)	1599(0.25%)	18287(1.72%)	27626(1.85%)	25399(1.32%)	0(0.00%)	6863(0.81%)	19810(1.55%)	20235(1.18%)	16414(0.77%)	0(0.00%)	9460(0.89%)	15478(1.03%)	12239(0.64%)	11077(0.47%)	0(0.00%)	33.68	11272(0.69%)	9171(0.45%)	8636(0.35%)	5495(1.75%)	18769(2.97%)	27674(2.91%)	24863(1.95%)	0(0.00%)	1367(0.29%)	14344(1.81%)	20772(1.86%)	19737(1.37%)	0(0.00%)	5998(0.94%)	14887(1.55%)	15980(1.25%)	12067(0.75%)	0(0.00%)	8471(1.06%)	11226(1.00%)	8719(0.60%)	7833(0.44%)	0(0.00%)	7431(0.81%)	7063(0.57%)	5914(0.38%)	6429(0.34%)	4268(2.04%)
SingletonReads	10443(2.48%)	16175(1.91%)	51291(4.03%)	135179(7.94%)	5605(2.68%)	8565(1.35%)	32492(3.06%)	108081(7.25%)	259308(13.50%)	6082(1.44%)	16595(1.95%)	68247(5.33%)	192991(11.29%)	403310(18.87%)	10624(1.66%)	43625(4.09%)	142907(9.55%)	330728(17.18%)	582078(24.73%)	19080(2.47%)		205123(12.59%)	422484(20.54%)	701014(28.20%)	9336(2.97%)	15114(2.39%)	41742(4.38%)	106183(8.33%)	4738(3.03%)	7854(1.66%)	27201(3.42%)	85095(7.62%)	202514(14.08%)	5417(1.71%)	16521(2.60%)	55507(5.79%)	150735(11.78%)	310984(19.42%)	9403(1.96%)	37574(4.70%)	115475(10.30%)	261610(18.14%)	456625(25.89%)	17036(2.87%)	65822(7.20%)	173050(14.01%)	343018(22.04%)	556974(29.67%)	6782(3.25%)
ChaffReads	10442(2.48%)	16174(1.91%)	51290(4.03%)	135176(7.94%)	5605(2.68%)	8565(1.35%)	32491(3.06%)	108081(7.25%)	259306(13.50%)	6082(1.44%)	16595(1.95%)	68247(5.33%)	192991(11.29%)	403307(18.87%)	10624(1.66%)	43625(4.09%)	142906(9.55%)	330727(17.18%)	582075(24.73%)	19080(2.47%)		205122(12.59%)	422482(20.54%)	701011(28.20%)	9336(2.97%)	15112(2.39%)	41741(4.38%)	106180(8.33%)	4737(3.03%)	7852(1.66%)	27199(3.42%)	85095(7.62%)	202511(14.08%)	5417(1.71%)	16520(2.60%)	55506(5.79%)	150735(11.78%)	310983(19.42%)	9403(1.96%)	37574(4.70%)	115475(10.30%)	261610(18.14%)	456624(25.89%)	17036(2.87%)	65822(7.20%)	173049(14.01%)	343016(22.04%)	556974(29.67%)	6782(3.25%)
[Coverage]																					NA
ContigsOnly	5.82	9.04	14.07	18.8	6.16	12.33	14.18	18.75	23.31	12.53	16.11	18.55	23.34	27.59	18.91	18.49	23.07	27.8	32.05	19.95	354695386	25.91	30.57	34.4	5.9	9.15	13.95	18.61	6.2	12.2	13.82	18.58	23.09	12.43	13.98	18.23	23.14	27.49	18.73	18.04	23.14	27.84	31.8	20.5	21.4	26.38	30.83	34.43	5.81
Contigs_Surrogates	6.19	11.11	15.83	20.37	6.16	12.49	17.05	21.36	25.23	12.53	17.87	22.09	25.91	29.42	18.91	23.02	26.91	30	33.52	19.95	47120780	29.04	32.2	35.67	6.2	11.05	15.87	20.12	6.2	12.41	16.97	21.14	25.23	12.43	17.29	22.1	25.81	29.27	18.73	22.75	26.49	29.8	33.28	20.5	25.7	29.11	32.34	35.75	6.19
Contigs_Degens_Surrogates	6.14	11.64	16.67	19.82	6.41	12.38	17.62	21.48	22.88	12.4	17.81	22.29	24.2	23.71	18.64	23.07	25.17	24.77	23.28	21.61	222155187	25.72	24.39	22.36	6.13	11.58	16.53	19.55	6.36	12.29	17.42	21.15	22.47	12.29	17.49	22.14	23.87	23.28	18.48	22.51	24.68	24.02	22.44	21.82	24.65	24.99	23.54	21.57	6.06
AllReads	7.07	13.45	22.27	31.27	7.48	12.69	20.68	30.03	39.63	12.81	18.99	28.56	38.46	48.63	19.71	28.44	37.31	48.13	58.63	28.43	70533933	43.6	54.19	64.84	7.29	13.72	22.11	31.48	7.33	12.69	20.53	29.91	39.5	12.79	19.7	28.74	38.58	48.67	19.88	27.89	38.03	48.61	58.91	28.76	34.56	44.98	55.43	66.03	7.23
[TotalBaseCounts]																					267600036
BasesCount	NA	NA	NA	NA	NA	NA	NA	NA	NA	NA	NA	NA	NA	NA	NA	NA	NA	NA	NA	NA		NA	NA	NA	NA	NA	NA	NA	NA	NA	NA	NA	NA	NA	NA	NA	NA	NA	NA	NA	NA	NA	NA	NA	NA	NA	NA	NA	NA
ClearRangeLengthFRG	NA	NA	NA	NA	NA	NA	NA	NA	NA	NA	NA	NA	NA	NA	NA	NA	NA	NA	NA	NA		NA	NA	NA	NA	NA	NA	NA	NA	NA	NA	NA	NA	NA	NA	NA	NA	NA	NA	NA	NA	NA	NA	NA	NA	NA	NA	NA	NA
ClearRangeLengthASM	72408962	146744281	221512849	297140041	76964660	151239647	226476462	302083872	377772271	152367880	227791352	303517173	379083238	454548932	233593772	309212733	384709333	460086931	535453310	279233136	33.1	430101977	505444391	580801559	54080659	109693700	165749435	222455364	57373740	113022653	169438897	226225904	283023955	113943764	170540809	227385374	284075787	340636109	174963576	231707092	288338767	344791533	401320389	214571489	271155390	327682468	384162993	440632043	35889249
SurrogateBaseLength	5022310	27073196	23730222	21077843	0	2186387	34596248	30958593	22965835	0	22220407	40970376	28823390	20122182	0	50798942	42313534	23231735	15556184	0		32816847	16909796	13066645	3188139	18289079	19237545	15254196	0	2106446	28440198	22834008	18941602	0	29706168	33082512	22439770	14706251	0	40539957	27304951	15423012	11624363	0	34978111	21190843	11597683	10080216	2643213
ContigBaseLength	59669838	98586594	139920475	178635249	63434977	146906763	155254083	188666495	222242731	149016107	193291631	197148856	230068495	257909042	224035576	201009935	237820247	265751473	292695184	195928384		255596789	285174754	308164842	43801971	73152777	104539536	131480132	48548595	108704527	114010174	140555481	165434705	110757574	120978449	144259855	170438416	192390480	164888909	149813217	175459463	197510937	216633109	152949411	167909502	192154214	213684016	229760550	28834689
DegenBaseLength	7526647	23250979	56606275	83713499	12318653	897581	33953702	68039582	91332604	2200774	10089362	55703927	87835846	105500615	6998466	49453015	78311981	108779534	117151986	78312692		100946036	120139431	122478736	6730829	19317525	40720450	64572788	7830606	1057412	24555066	51236107	66308317	2132013	17567636	41853505	65838356	78397980	7770406	34548626	64062695	82261153	86436178	57103358	54648125	79350406	90708936	91116807	4200987
SingletonBaseLength	1499811	2246448	7484848	19927800	1211030	1506515	5787642	19188066	45909246	1150999	3330941	13050402	35855630	74052326	2559730	9509832	28918831	64593419	112160978	4992060	98917131	42724516	84940054	138771474	1327110	2077903	6042924	15708384	994539	1388764	4824849	15143877	35919105	1054177	3289123	10678999	28156639	57369694	2304261	8213828	23437462	51167343	88160553	4518720	14882575	36250913	69307928	110950556	941012
Contig_SurrBaseLength	63382504	121246854	157421726	193498742	63434977	148835551	186735118	214856224	240530421	149016107	214371049	234762844	255391762	274995991	224035576	250249886	277478521	286713978	306140346	195928384	3504405	286431425	300364906	319551349	46022720	88298272	118986061	142174192	48548595	110576477	140058982	159845920	180796533	110757574	149684050	174852870	190080792	204868435	164888909	188944638	200838610	211363037	226723658	152949411	201624690	212081149	224146129	238564680	30747250
[gcContent]
Content	34.83	34.51	33.94	33.49	34.7	34.07	33.94	33.47	33.03	33.94	33.68	33.42	32.96	32.62	33.24	33.38	32.98	32.57	32.23	33.12		32.7	32.32	32.03	34.66	34.3	33.81	33.36	34.51	33.91	33.83	33.38	32.91	33.79	33.72	33.29	32.83	32.47	33.12	33.32	32.78	32.41	32.1	32.98	33	32.45	32.15	31.91	34.89
[Unitig Consensus]																					30029120
NumColumnsInUnitigs	44494564	51195821	72914389	122369475	40010848	47269149	64044260	115220521	213282764	41782257	53470748	90554765	172993843	308381235	47440590	74775630	145222519	268742173	438069150	56040255	14578095	190880363	337519651	527343939	33996041	39724024	56139471	94002362	30264612	36569573	50224107	89747715	165588363	32023367	42265583	70685519	134359532	238928488	36868561	59566822	114411772	211544437	342789848	44723878	82072245	156790669	271649399	419646288	22934661
NumGapsInUnitigs	710642	1439396	2072138	2620241	912889	1627347	2258877	2770906	3153238	1757801	2404711	2950928	3362182	3635043	2574566	3141944	3580713	3876037	4055233	2991516	1006199	3882390	4116682	4239255	525685	1071755	1548130	1957417	680757	1212232	1684794	2067435	2348062	1316114	1795344	2205570	2511997	2707326	1930870	2350423	2674522	2887590	3008766	2291472	2662123	2930307	3094701	3170674	348299
NumRunsOfGapsInUnitigReads	5612687	20476703	41164469	63348861	7477491	23857240	46995938	70960699	90869352	26167764	50745814	77621141	100476723	115885468	56144012	85342929	110836765	128516994	138491557	75681560	28215692	127854322	141515830	147719396	4154917	15199479	30699020	47264281	5545886	17706137	34919573	52725644	67399276	19522193	37726945	57905725	74759423	85635835	41880803	63367476	82078711	94257311	100945974	58962608	80090170	96216070	105400333	109092505	2739603
[Contig Consensus]																					116350
NumColumnsInUnitigs	11778004	12837234	13502280	14849286	12129175	12638996	13193633	14046315	15551327	12787257	13350941	13926155	15274317	17271360	13276043	13904306	15246430	17254780	19570070	13716955		16311778	18631668	21229673	8777724	9614044	10148819	11223426	9096322	9487791	9940888	10635084	11775975	9628230	10075922	10448405	11532410	13083914	10001910	10603877	11576710	13191228	14990315	10411985	11202235	12614803	14427739	16375426	5884931
NumGapsInUnitigs	233010	419684	661480	863370	307180	548651	669667	878167	1049601	596505	749532	894327	1089744	1225090	880251	913408	1112194	1287595	1390858	1025928		1248613	1392089	1465034	174431	317427	487277	646043	228905	407653	491559	656598	777860	446426	513051	659741	812698	915537	660144	675053	844250	965355	1031911	786450	805064	952947	1050485	1094416	114173
NumRunsOfGapsInUnitigReads	1806264	5505647	12580239	20632351	2540381	8096371	13104501	21640912	29974435	8970231	15378511	22285334	31905721	39211087	19402292	23206174	32979677	42405096	48383185	26241414		40125519	48209597	52454198	1354655	4196889	9253493	15412917	1883363	5997603	9472575	16134347	22011321	6690069	10038764	16271681	23599081	29090137	14468677	16840513	25056958	31497937	35376089	20459044	22972650	30783703	36132389	38841904	876327
NumColumnsInContigs	11774775	12827815	13482399	14817638	12123925	12624635	13171837	14012171	15505657	12770241	13324351	13889416	15224796	17211776	13241211	13865223	15193452	17189420	19496509	13671262		16247896	18557947	21150042	8775313	9606966	10133985	11199906	9092497	9476848	9924930	10609507	11741921	9615452	10058200	10421690	11495224	13039734	9975881	10575035	11536237	13142313	14936669	10376165	11163949	12566154	14372030	16316795	5883307
NumGapsInContigs	229730	410203	641579	831684	301882	534242	647837	844017	1003905	579476	722905	857559	1040210	1165473	845411	874294	1059181	1222188	1317261	980229		1184697	1318331	1385377	171972	310309	472413	622507	225053	396673	475581	631006	743793	433633	495301	633008	775497	871344	634107	646189	803754	916422	978257	750628	766771	904282	994761	1035756	112508
NumRunsOfGapsInContigReads	1767249	5334078	12078070	19656866	2473364	7808724	12539137	20555342	28316967	8619214	14662863	21104670	30051604	36785328	18399428	21925732	30968833	39662942	45108771	24740227		37509594	44932139	48776979	1325314	4066798	8881456	14688393	1834529	5777688	9063166	15322354	20785966	6429389	9580761	15421405	22224783	27297559	13726326	15910962	23528032	29463297	33014079	19267468	21576371	28773818	33674502	36147536	856881
NumAAMismatches	12841	34147	72901	111411	14663	48923	74268	117657	154862	46842	82410	113936	158708	188436	96806	117476	158286	198234	220136	122851		183218	214997	230656	9705	26135	54226	83911	10817	36856	54060	88052	114867	35327	54606	83786	118333	140693	72362	85982	120555	148119	163331	96225	109934	140059	162714	173556	6323
NumVARStringsWithFlankingGaps	11864	31312	64415	94833	13800	44579	64841	98659	125774	42487	71707	95455	128249	148840	83089	97587	127601	154846	169522	102617		144577	166144	175604	9027	23893	47719	71263	10197	33414	47324	73634	93141	32033	47592	70315	95316	111060	62182	71778	96866	115742	125406	79826	88895	110435	125258	131422	5762
[truncated: 143 more columns]
