# Supplementary material for: Assessing pooled BAC and whole genome shotgun strategies for assembly of complex genomes
Source: BMC Genomics. 2011 Apr 15;12:194. doi: 10.1186/1471-2164-12-194 (PMC3224119; doi:10.1186/1471-2164-12-194)
Supplement: Additional file 5 — Arabidopsis pools' assembly scores. Table showing assembly evaluation scores for Arabidopsis pool assemblies. [file 1471-2164-12-194-S5.XLS]

## Sheet: Sheet 1
Arabidopsis pooled BAC assembly quality scores
Species	Pool Size	Coverage Mix	Relocation	Inversion	Redundancy	Match	Coverage	Parameters
Arabidopsis thaliana	3M	20L-10P	0.989274	0.972801	0.959599	0.688934	0.999273	toggled
Arabidopsis thaliana	3M	15L-10P	0.994539	0.980119	0.962281	0.652611	0.999349	toggled
Arabidopsis thaliana	3M	20L-15P	0.804185	0.940568	0.934621	0.646556	0.999437	toggled
Arabidopsis thaliana	3M	15L-5P	0.998236	0.996476	0.97923	0.644976	0.998624	toggled
Arabidopsis thaliana	3M	20L-5P	0.992942	0.976034	0.972223	0.64108	0.998658	toggled
Arabidopsis thaliana	3M	10L-10P	0.997318	0.989222	0.972577	0.635776	0.99839	toggled
Arabidopsis thaliana	3M	5L-20P	0.985999	0.93276	0.96385	0.609593	0.996001	toggled
Arabidopsis thaliana	3M	10L-15P	0.988071	0.99038	0.953601	0.609387	0.997854	toggled
Arabidopsis thaliana	3M	10L-20P	0.757493	0.777564	0.92816	0.600882	0.998633	toggled
Arabidopsis thaliana	3M	15L-20P	0.732279	0.949597	0.941643	0.583965	0.997487	toggled
Arabidopsis thaliana	3M	5L-15P	0.960562	0.783483	0.946508	0.5773	0.994316	toggled
Arabidopsis thaliana	3M	20L-20P	0.80754	0.924029	0.934974	0.575168	0.979427	toggled
Arabidopsis thaliana	3M	10L-5P	0.789991	0.952439	0.943591	0.573672	0.998313	toggled
Arabidopsis thaliana	3M	15L-15P	0.915199	0.907609	0.948693	0.565463	0.973398	toggled
Arabidopsis thaliana	3M	0L-15P	0.874199	0.743518	0.950385	0.557608	0.978084	toggled
Arabidopsis thaliana	3M	0L-20P	0.939709	0.823344	0.953617	0.550607	0.992651	toggled
Arabidopsis thaliana	3M	5L-10P	0.92705	0.931032	0.923477	0.550307	0.978272	toggled
Arabidopsis thaliana	3M	5L-5P	0.992129	0.949437	0.970959	0.520823	0.993445	toggled
Arabidopsis thaliana	3M	20L-0P	0.993762	0.909624	0.975515	0.520624	0.850324	toggled
Arabidopsis thaliana	3M	15L-0P	0.990117	0.905938	0.979733	0.515672	0.84424	toggled
Arabidopsis thaliana	3M	0L-10P	0.919994	0.885107	0.963609	0.51353	0.986458	toggled
Arabidopsis thaliana	3M	10L-0P	0.990607	0.871348	0.971221	0.507496	0.751936	toggled
Arabidopsis thaliana	3M	0L-5P	0.971142	0.715429	0.816915	0.500776	0.732891	toggled
Arabidopsis thaliana	3M	5L-0P	0.993942	0.696662	0.97412	0.498987	0.431873	toggled
Arabidopsis thaliana	6M	20L-5P	0.805664	0.940981	0.963087	0.711218	0.998103	toggled
Arabidopsis thaliana	6M	15L-10P	0.69085	0.949518	0.967073	0.693513	0.999116	toggled
Arabidopsis thaliana	6M	20L-10P	0.858697	0.908246	0.956163	0.687103	0.998383	toggled
Arabidopsis thaliana	6M	20L-15P	0.915246	0.957055	0.96631	0.626653	0.996676	toggled
Arabidopsis thaliana	6M	15L-5P	0.9617	0.912341	0.965897	0.621773	0.996151	toggled
Arabidopsis thaliana	6M	15L-15P	0.846801	0.901679	0.956435	0.610847	0.998951	toggled
Arabidopsis thaliana	6M	10L-15P	0.919298	0.930617	0.968513	0.610608	0.99863	toggled
Arabidopsis thaliana	6M	5L-15P	0.916435	0.923632	0.964744	0.607492	0.998301	toggled
Arabidopsis thaliana	6M	5L-20P	0.952071	0.839145	0.956018	0.606749	0.998532	toggled
Arabidopsis thaliana	6M	5L-10P	0.990333	0.89906	0.982667	0.604626	0.997448	toggled
Arabidopsis thaliana	6M	20L-20P	0.996408	0.882884	0.975599	0.600255	0.994155	toggled
Arabidopsis thaliana	6M	10L-10P	0.956078	0.9033	0.969775	0.596861	0.998839	toggled
Arabidopsis thaliana	6M	15L-20P	0.998366	0.851324	0.979	0.589712	0.988825	toggled
Arabidopsis thaliana	6M	10L-5P	0.996981	0.990342	0.984971	0.583783	0.999532	toggled
Arabidopsis thaliana	6M	10L-20P	0.958773	0.798335	0.957242	0.575875	0.991903	toggled
Arabidopsis thaliana	6M	0L-20P	0.875086	0.790895	0.967321	0.553708	0.99368	toggled
Arabidopsis thaliana	6M	0L-15P	0.751315	0.805209	0.972933	0.536691	0.988791	toggled
Arabidopsis thaliana	6M	15L-0P	0.99619	0.92906	0.987583	0.530803	0.895715	toggled
Arabidopsis thaliana	6M	20L-0P	0.997147	0.915462	0.98614	0.524508	0.885845	toggled
Arabidopsis thaliana	6M	10L-0P	0.997416	0.822935	0.985384	0.521503	0.849185	toggled
Arabidopsis thaliana	6M	5L-5P	0.773545	0.824728	0.957904	0.516019	0.99602	toggled
Arabidopsis thaliana	6M	0L-10P	0.790928	0.485106	0.973605	0.507677	0.988948	toggled
Arabidopsis thaliana	6M	0L-5P	0.991467	0.931221	0.821078	0.500403	0.73558	toggled
Arabidopsis thaliana	6M	5L-0P	0.998301	0.679245	0.975603	0.499742	0.445351	toggled
Arabidopsis thaliana	9M	15L-10P	0.809735	0.746559	0.978975	0.70005	0.99749	toggled
Arabidopsis thaliana	9M	15L-5P	0.763957	0.862338	0.979629	0.696096	0.999101	toggled
Arabidopsis thaliana	9M	20L-5P	0.706412	0.981632	0.984665	0.691907	0.999124	toggled
Arabidopsis thaliana	9M	20L-15P	0.976066	0.89997	0.983616	0.638024	0.996159	toggled
Arabidopsis thaliana	9M	10L-10P	0.902492	0.964254	0.976171	0.630555	0.999515	toggled
Arabidopsis thaliana	9M	20L-10P	0.721971	0.784492	0.974227	0.626958	0.999308	toggled
Arabidopsis thaliana	9M	10L-5P	0.688474	0.900696	0.982503	0.616006	0.99902	toggled
Arabidopsis thaliana	9M	10L-15P	0.911399	0.843788	0.976728	0.602911	0.998059	toggled
Arabidopsis thaliana	9M	20L-20P	0.775996	0.886242	0.965386	0.5931	0.98997	toggled
Arabidopsis thaliana	9M	15L-20P	0.859836	0.903058	0.972328	0.585605	0.996076	toggled
Arabidopsis thaliana	9M	15L-15P	0.906778	0.95056	0.97668	0.579614	0.990539	toggled
Arabidopsis thaliana	9M	10L-20P	0.686547	0.747073	0.975576	0.565388	0.99459	toggled
Arabidopsis thaliana	9M	5L-20P	0.869694	0.860952	0.974277	0.564008	0.996045	toggled
Arabidopsis thaliana	9M	5L-15P	0.691473	0.837762	0.970181	0.55622	0.996752	toggled
Arabidopsis thaliana	9M	0L-20P	0.89088	0.860173	0.981571	0.546873	0.993366	toggled
Arabidopsis thaliana	9M	0L-15P	0.597695	0.51192	0.978418	0.537387	0.994802	toggled
Arabidopsis thaliana	9M	5L-10P	0.793532	0.865348	0.977521	0.535025	0.997865	toggled
Arabidopsis thaliana	9M	15L-0P	0.995394	0.935242	0.988525	0.521986	0.920882	toggled
Arabidopsis thaliana	9M	20L-0P	0.986895	0.922156	0.988534	0.520187	0.915941	toggled
Arabidopsis thaliana	9M	5L-5P	0.91119	0.822516	0.980317	0.508812	0.997425	toggled
Arabidopsis thaliana	9M	10L-0P	0.989637	0.886392	0.986192	0.506952	0.842768	toggled
Arabidopsis thaliana	9M	0L-10P	0.802594	0.85179	0.97419	0.503988	0.989675	toggled
Arabidopsis thaliana	9M	0L-5P	0.995537	0.917917	0.8211	0.500407	0.741944	toggled
Arabidopsis thaliana	9M	5L-0P	0.998924	0.742918	0.984795	0.499958	0.472146	toggled
Arabidopsis thaliana	12M	20L-10P	0.919448	0.857658	0.9741	0.641654	0.99956	toggled
Arabidopsis thaliana	12M	20L-5P	0.972262	0.872608	0.982149	0.635141	0.999873	toggled
Arabidopsis thaliana	12M	20L-15P	0.956527	0.947367	0.977406	0.611793	0.998146	toggled
Arabidopsis thaliana	12M	15L-5P	0.962479	0.772507	0.981736	0.596368	0.999452	toggled
Arabidopsis thaliana	12M	10L-10P	0.921968	0.772635	0.98049	0.595535	0.999045	toggled
Arabidopsis thaliana	12M	10L-15P	0.936963	0.851689	0.970534	0.594641	0.998751	toggled
Arabidopsis thaliana	12M	15L-10P	0.984557	0.769903	0.984231	0.592409	0.996669	toggled
Arabidopsis thaliana	12M	10L-20P	0.893868	0.761253	0.97593	0.578624	0.994642	toggled
Arabidopsis thaliana	12M	5L-20P	0.850977	0.693696	0.9785	0.570557	0.999126	toggled
Arabidopsis thaliana	12M	15L-15P	0.997387	0.896325	0.979938	0.567334	0.999248	toggled
Arabidopsis thaliana	12M	15L-20P	0.964714	0.834783	0.971412	0.56586	0.992924	toggled
Arabidopsis thaliana	12M	20L-20P	0.970215	0.806568	0.973981	0.565731	0.995101	toggled
Arabidopsis thaliana	12M	5L-15P	0.965201	0.890964	0.976034	0.564245	0.998907	toggled
Arabidopsis thaliana	12M	10L-5P	0.964578	0.737498	0.98503	0.555533	0.998987	toggled
Arabidopsis thaliana	12M	5L-10P	0.804096	0.682698	0.979003	0.545201	0.999078	toggled
Arabidopsis thaliana	12M	0L-20P	0.928346	0.817102	0.98335	0.530529	0.997294	toggled
Arabidopsis thaliana	12M	0L-15P	0.85787	0.670521	0.984036	0.522909	0.994003	toggled
Arabidopsis thaliana	12M	20L-0P	0.998304	0.963025	0.991941	0.515858	0.926079	toggled
Arabidopsis thaliana	12M	15L-0P	0.998331	0.96363	0.990376	0.515459	0.909482	toggled
Arabidopsis thaliana	12M	5L-5P	0.845732	0.92877	0.977254	0.508567	0.998432	toggled
Arabidopsis thaliana	12M	10L-0P	0.99894	0.903011	0.989701	0.504269	0.822458	toggled
Arabidopsis thaliana	12M	0L-10P	0.963192	0.917684	0.982859	0.503036	0.990122	toggled
Arabidopsis thaliana	12M	0L-5P	0.95073	0.906931	0.823618	0.500342	0.77075	toggled
Arabidopsis thaliana	12M	5L-0P	0.999195	0.749753	0.988323	0.499875	0.473425	toggled
Arabidopsis thaliana	3M	10L-5P	0.992981	0.968839	0.97424	0.529037	0.904429	default
Arabidopsis thaliana	3M	10L-10P	0.993575	0.964451	0.965413	0.527626	0.836351	default
Arabidopsis thaliana	3M	15L-5P	0.99331	0.953939	0.961749	0.526674	0.874405	default
Arabidopsis thaliana	3M	5L-5P	0.993204	0.956866	0.96636	0.525913	0.810002	default
Arabidopsis thaliana	3M	20L-5P	0.99303	0.95769	0.966369	0.52591	0.809376	default
Arabidopsis thaliana	3M	15L-10P	0.991835	0.944025	0.97389	0.525834	0.817695	default
Arabidopsis thaliana	3M	15L-15P	0.992003	0.963704	0.966458	0.524641	0.78721	default
Arabidopsis thaliana	3M	10L-20P	0.992374	0.971871	0.907928	0.524216	0.781797	default
Arabidopsis thaliana	3M	10L-15P	0.991688	0.945264	0.968826	0.524124	0.798578	default
Arabidopsis thaliana	3M	15L-20P	0.991142	0.922908	0.968971	0.523375	0.7694	default
Arabidopsis thaliana	3M	0L-20P	0.992568	0.965296	0.965831	0.519517	0.795938	default
Arabidopsis thaliana	3M	0L-15P	0.990107	0.926782	0.969329	0.518786	0.815665	default
Arabidopsis thaliana	3M	5L-15P	0.99178	0.948694	0.964882	0.515918	0.770984	default
Arabidopsis thaliana	3M	20L-15P	0.991289	0.949468	0.964471	0.515913	0.769868	default
Arabidopsis thaliana	3M	5L-10P	0.991946	0.959404	0.969367	0.515677	0.774878	default
Arabidopsis thaliana	3M	20L-10P	0.991847	0.96422	0.969895	0.515676	0.774593	default
Arabidopsis thaliana	3M	20L-20P	0.992114	0.964016	0.970171	0.511843	0.755728	default
Arabidopsis thaliana	3M	5L-20P	0.992114	0.964016	0.970171	0.511843	0.755728	default
Arabidopsis thaliana	3M	15L-0P	0.991213	0.839216	0.978875	0.510635	0.735819	default
Arabidopsis thaliana	3M	5L-0P	0.99138	0.889952	0.973667	0.507523	0.697314	default
Arabidopsis thaliana	3M	20L-0P	0.991931	0.871852	0.973049	0.507434	0.690093	default
Arabidopsis thaliana	3M	0L-10P	0.980256	0.884104	0.956026	0.503735	0.841796	default
Arabidopsis thaliana	3M	10L-0P	0.993888	0.695847	0.978941	0.501998	0.561222	default
Arabidopsis thaliana	3M	0L-5P	0.991368	0.858904	0.798149	0.500179	0.618251	default
Arabidopsis thaliana	6M	10L-5P	0.974266	0.93565	0.973269	0.535364	0.923951	default
Arabidopsis thaliana	6M	5L-10P	0.998427	0.982509	0.966871	0.521771	0.884076	default
Arabidopsis thaliana	6M	15L-5P	0.997117	0.976389	0.969377	0.518194	0.865515	default
Arabidopsis thaliana	6M	15L-0P	0.99744	0.885133	0.984073	0.514511	0.870792	default
Arabidopsis thaliana	6M	5L-15P	0.997832	0.983593	0.975995	0.51396	0.812654	default
Arabidopsis thaliana	6M	10L-10P	0.997632	0.983859	0.978001	0.513396	0.832387	default
Arabidopsis thaliana	6M	5L-20P	0.989224	0.982505	0.983531	0.512987	0.791583	default
Arabidopsis thaliana	6M	10L-15P	0.993623	0.976087	0.979331	0.512487	0.803955	default
Arabidopsis thaliana	6M	15L-10P	0.997404	0.972807	0.981149	0.512378	0.803418	default
Arabidopsis thaliana	6M	20L-5P	0.997852	0.976583	0.976474	0.512265	0.809579	default
Arabidopsis thaliana	6M	15L-15P	0.997692	0.980981	0.97671	0.512046	0.779863	default
Arabidopsis thaliana	6M	10L-20P	0.997559	0.980031	0.980897	0.511568	0.766516	default
Arabidopsis thaliana	6M	20L-10P	0.997862	0.98029	0.981198	0.511565	0.767386	default
Arabidopsis thaliana	6M	5L-5P	0.81628	0.937567	0.981073	0.51127	0.988191	default
Arabidopsis thaliana	6M	15L-20P	0.997795	0.983163	0.982155	0.510097	0.759628	default
Arabidopsis thaliana	6M	0L-20P	0.995408	0.984197	0.977207	0.509142	0.777973	default
Arabidopsis thaliana	6M	20L-15P	0.996121	0.983784	0.982208	0.50845	0.748008	default
Arabidopsis thaliana	6M	10L-0P	0.99666	0.864448	0.984372	0.507526	0.737002	default
Arabidopsis thaliana	6M	20L-20P	0.997711	0.979554	0.981683	0.505948	0.730167	default
Arabidopsis thaliana	6M	0L-15P	0.99624	0.965013	0.981555	0.505883	0.808073	default
Arabidopsis thaliana	6M	20L-0P	0.996884	0.876531	0.980876	0.504662	0.718082	default
Arabidopsis thaliana	6M	0L-10P	0.995861	0.946546	0.968196	0.502519	0.844795	default
Arabidopsis thaliana	6M	0L-5P	0.997086	0.900986	0.818602	0.4998	0.677212	default
Arabidopsis thaliana	6M	5L-0P	0.998895	0.752904	0.988208	0.498809	0.352171	default
Arabidopsis thaliana	9M	10L-5P	0.955328	0.987274	0.967099	0.515552	0.919533	default
Arabidopsis thaliana	9M	15L-5P	0.926884	0.985309	0.975493	0.511048	0.8572	default
Arabidopsis thaliana	9M	5L-10P	0.954022	0.934852	0.97464	0.510868	0.891922	default
Arabidopsis thaliana	9M	10L-10P	0.954012	0.984732	0.983166	0.509926	0.847154	default
Arabidopsis thaliana	9M	15L-0P	0.985904	0.900644	0.986296	0.509652	0.869086	default
Arabidopsis thaliana	9M	5L-15P	0.969909	0.974313	0.970571	0.508678	0.823686	default
Arabidopsis thaliana	9M	20L-5P	0.966759	0.966896	0.982787	0.508134	0.816773	default
Arabidopsis thaliana	9M	10L-15P	0.967183	0.987769	0.986169	0.5079	0.797912	default
Arabidopsis thaliana	9M	15L-10P	0.958148	0.976102	0.983721	0.507744	0.802245	default
Arabidopsis thaliana	9M	5L-5P	0.855293	0.962523	0.985916	0.507354	0.990526	default
Arabidopsis thaliana	9M	0L-20P	0.968966	0.970934	0.985121	0.506806	0.787277	default
Arabidopsis thaliana	9M	15L-15P	0.969286	0.971742	0.984623	0.506608	0.771301	default
Arabidopsis thaliana	9M	20L-10P	0.970189	0.980539	0.986338	0.506578	0.774967	default
Arabidopsis thaliana	9M	5L-20P	0.959508	0.961456	0.988922	0.506185	0.789349	default
Arabidopsis thaliana	9M	10L-0P	0.978851	0.884683	0.986684	0.506111	0.808279	default
Arabidopsis thaliana	9M	10L-20P	0.963549	0.987685	0.986623	0.506098	0.776365	default
Arabidopsis thaliana	9M	0L-15P	0.965922	0.97302	0.983837	0.505831	0.813232	default
Arabidopsis thaliana	9M	20L-0P	0.992828	0.920314	0.986109	0.505591	0.771657	default
Arabidopsis thaliana	9M	15L-20P	0.964638	0.969384	0.986531	0.505453	0.757441	default
Arabidopsis thaliana	9M	20L-20P	0.964089	0.983701	0.986486	0.505153	0.746127	default
Arabidopsis thaliana	9M	20L-15P	0.962554	0.957217	0.98259	0.504916	0.757878	default
Arabidopsis thaliana	9M	0L-10P	0.972494	0.959615	0.970166	0.501349	0.843572	default
Arabidopsis thaliana	9M	0L-5P	0.996787	0.905746	0.811253	0.500207	0.678593	default
Arabidopsis thaliana	9M	5L-0P	0.998876	0.777538	0.989438	0.499258	0.380312	default
Arabidopsis thaliana	12M	10L-5P	0.99975	0.978025	0.965036	0.52828	0.972704	default
Arabidopsis thaliana	12M	15L-5P	0.998944	0.981374	0.98202	0.510409	0.873614	default
Arabidopsis thaliana	12M	10L-10P	0.998663	0.973816	0.976438	0.509731	0.850406	default
Arabidopsis thaliana	12M	5L-10P	0.998806	0.98242	0.976536	0.508275	0.888658	default
Arabidopsis thaliana	12M	15L-0P	0.998463	0.921262	0.989243	0.507419	0.88046	default
Arabidopsis thaliana	12M	20L-5P	0.999016	0.98059	0.982881	0.506883	0.827721	default
Arabidopsis thaliana	12M	10L-15P	0.996428	0.959219	0.98555	0.506505	0.797954	default
Arabidopsis thaliana	12M	5L-15P	0.998333	0.966606	0.986106	0.506442	0.81569	default
Arabidopsis thaliana	12M	15L-10P	0.998671	0.979326	0.983208	0.506388	0.812355	default
Arabidopsis thaliana	12M	20L-10P	0.9987	0.96971	0.986318	0.506307	0.787669	default
Arabidopsis thaliana	12M	5L-20P	0.997953	0.973111	0.986604	0.5061	0.786132	default
Arabidopsis thaliana	12M	20L-15P	0.998727	0.973904	0.986151	0.505715	0.761168	default
Arabidopsis thaliana	12M	10L-20P	0.998773	0.990591	0.98724	0.505473	0.771337	default
Arabidopsis thaliana	12M	5L-5P	0.994973	0.912572	0.984109	0.505375	0.992952	default
Arabidopsis thaliana	12M	0L-20P	0.998248	0.964925	0.985633	0.505029	0.786929	default
Arabidopsis thaliana	12M	15L-15P	0.998805	0.983396	0.986213	0.504739	0.772009	default
Arabidopsis thaliana	12M	0L-15P	0.998511	0.978343	0.983389	0.504481	0.812512	default
Arabidopsis thaliana	12M	20L-0P	0.998317	0.9359	0.991707	0.504262	0.745069	default
Arabidopsis thaliana	12M	20L-20P	0.998756	0.984075	0.987002	0.504117	0.746135	default
Arabidopsis thaliana	12M	10L-0P	0.998224	0.869751	0.990701	0.504115	0.810602	default
Arabidopsis thaliana	12M	15L-20P	0.998787	0.983584	0.986214	0.504113	0.7558	default
Arabidopsis thaliana	12M	0L-10P	0.998551	0.96246	0.965358	0.501193	0.868223	default
Arabidopsis thaliana	12M	0L-5P	0.998049	0.943154	0.814335	0.500124	0.701731	default
Arabidopsis thaliana	12M	5L-0P	0.999515	0.758742	0.989824	0.499295	0.372416	default
