# Supplementary material for: Assessing pooled BAC and whole genome shotgun strategies for assembly of complex genomes
Source: BMC Genomics. 2011 Apr 15;12:194. doi: 10.1186/1471-2164-12-194 (PMC3224119; doi:10.1186/1471-2164-12-194)
Supplement: Additional file 7 — CABOG assembly statistics. Tar archive containing CABOG assembly statistics for each assembly in our simulation study. [file 1471-2164-12-194-S7.ZIP]

Archive with 1 entries (1 files):
- ASSEMBLY_QC_FILES.tar
